# Supplementary material for: Fungal Lysine Deacetylases in Virulence, Resistance, and Production of Small Bioactive Compounds
Source: MDPI journal article supplement (doi:10.3390/genes12101470), 2021-09-23
Supplement: s1 [file s1]

**Table S1.** Nomenclature of fungal KDACs in different fungal species.

| Organism                         | Class 1                                                                                  |                               | Class2                       |                    |
|----------------------------------|------------------------------------------------------------------------------------------|-------------------------------|------------------------------|--------------------|
| <i>Saccharomyces cerevisiae</i>  | Rpd3 (YNL330C)                                                                           | Hos2 (YGL194C)                | Hda1 (YNL021W)               | Hos3 (YPL116W)     |
| <i>Schizosaccharomyces pombe</i> | Clr6 (SPBC36.05c)                                                                        | Hos2/Phd1 (SPAC3G9.07c)       | Clr3 (SPBC800.03)            | No ortholog        |
| <i>Candida albicans</i>          | Rpd3 (CR_02760C_A)<br>Rpd31 (C3_07000W_A)                                                | Hos2 (C3_00780W_A)            | Hda1 (CR_02050C_A)           | Hos3 (C4_02300W_A) |
| <i>Aspergillus nidulans</i>      | RpdA (AN4493)                                                                            | HosA (AN3806)                 | HdaA (AN8042)                | HosB (AN7019)      |
| <i>Aspergillus fumigatus</i>     | RpdA (Afu2g03390)                                                                        | HosA (Afu2g03810)             | HdaA (Afu5g01980)            | HosB (Afu4g04290)  |
| <i>Fusarium graminearum</i>      | Hda3 (FGRAMPH1_01G01959)                                                                 | Hdf1/Hda2 (FGRAMPH1_01G03337) | HDF2Hda1 (FGRAMPH1_01G15009) | FGRAMPH1_01G18387  |
| <i>Magnaporthe oryzae</i>        | Rpd3 (MGG_05857)                                                                         | Hos2 (MGG_01633)              | Hda1 (MGG_01076)             | Hos3 (MGG_06043)   |
| <i>Botrytis cinerea</i>          | Rpd3 (Bcin05g02590)                                                                      | Hos2 (Bcin01g03610)           | Hda1 (Bcin15g02130)          | Bcin12g01310       |
| <i>Beauveria bassiana</i>        | Rpd3 (EJP69682.1)                                                                        | XP_008603650.1                | Hda1/Clr3 (EJP66596.1)       | XP_008600884.1     |
| <i>Ustilago maydis</i>           | Hda1 (UMAG_02065)<br>UMAG_11308                                                          | Hos2 (UMAG_11828)             | UMAG_02102                   | UMAG_10914         |
| <i>Cochliobolus carbonum</i>     | Hdc2 (AAK35180.1)                                                                        | Hdc1 (AAL56814.1)             | AAP95014.1                   | AAP94999.1         |
| <i>Cryptococcus neoformans</i>   | Rpd304 (CNAG_05690)<br>Rpd301 (CNAG_01699)<br>Rpd302 (CNAG_05096)<br>Rpd303 (CNAG_05276) | Hos2 (CNAG_05563)             | Hda1 (CNAG_01563)            | Hos3 (CNAG_00660)  |
